# Supplementary material for: Quantitative Evaluation of Maize Emergence Using UAV Imagery and Deep Learning
Source: MDPI journal article supplement (doi:10.3390/rs15081979), 2023-04-09
Supplement: s1 [file s1]

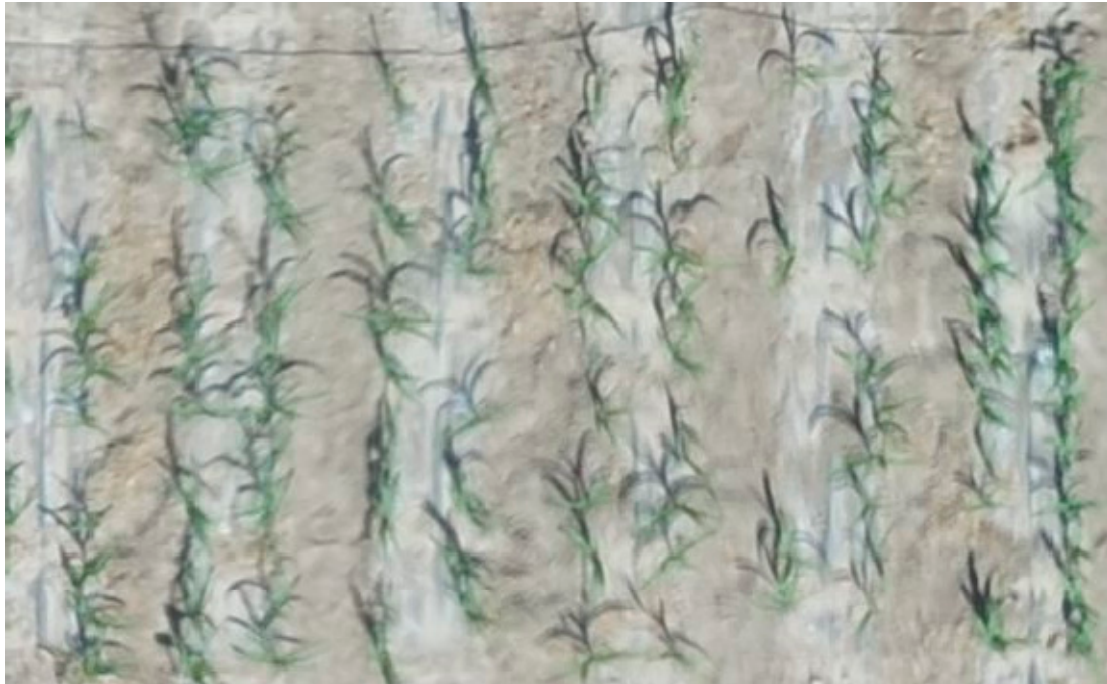

Figure S1. Aerial image of maize seedlings at Zhangye Experimental Station in 2022.

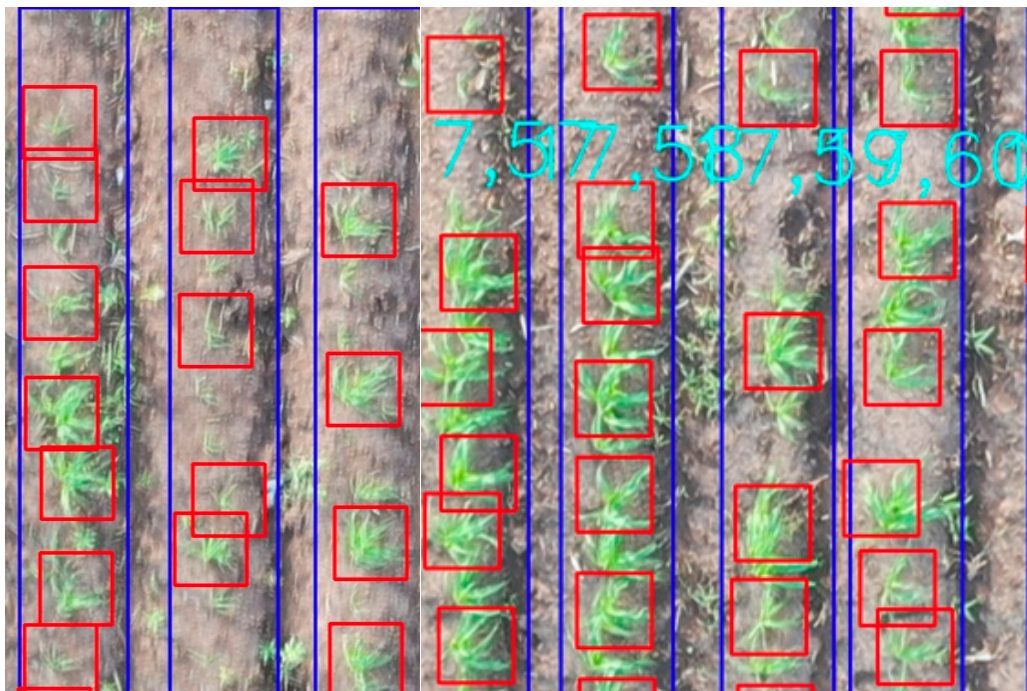

Figure S2. The measurement system removes the influence of weeds outside the row through the detection of maize rows.

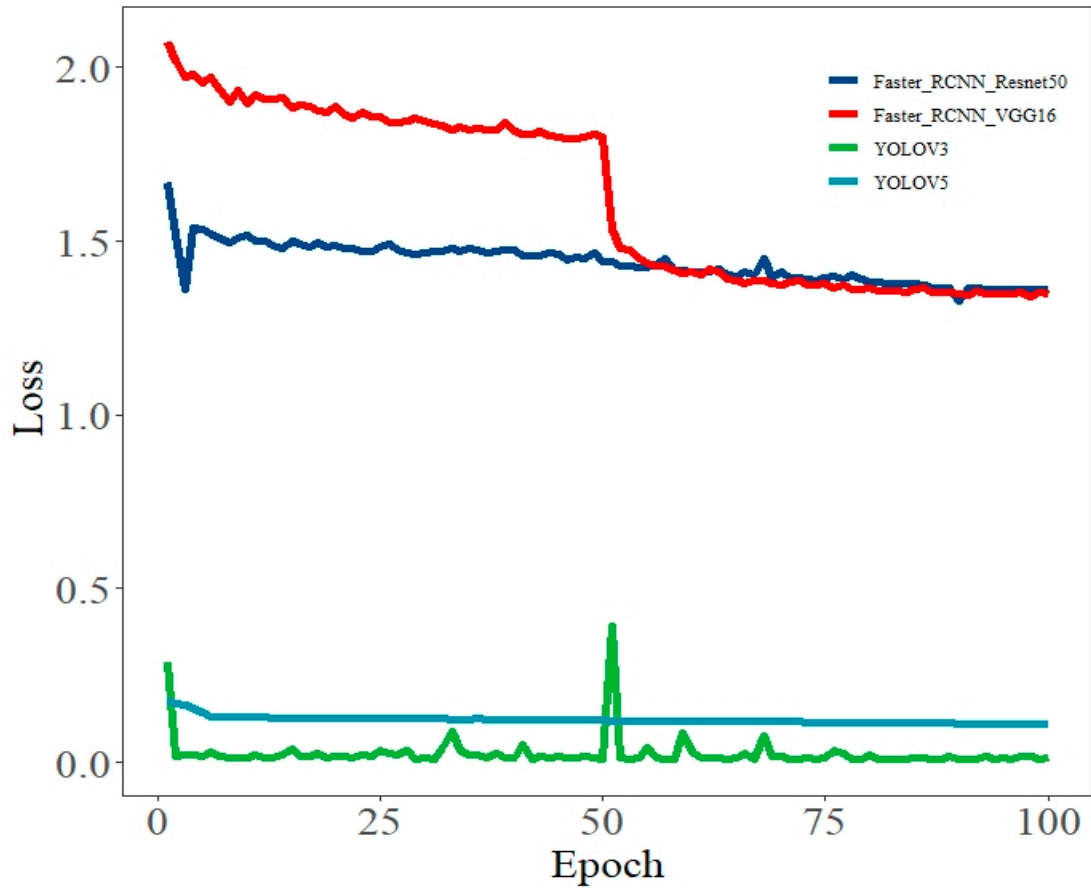

Figure S3. Performance comparison of four algorithms (Faster\_RCNN\_Resnet50, Faster\_RCNN\_VGG16, YOLO\_v3 and YOLO\_v5) in maize seedling prediction.

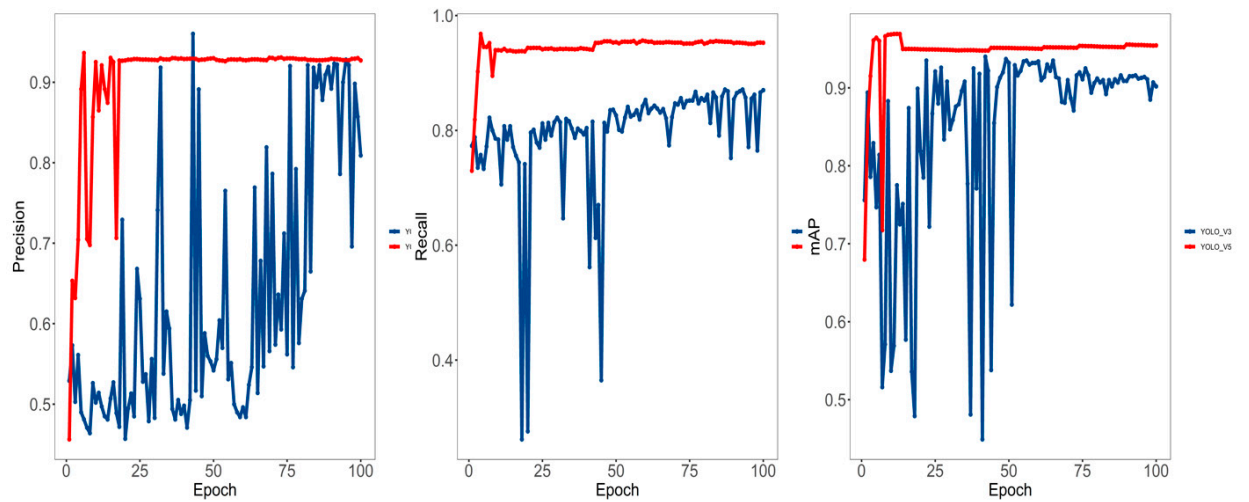

Figure S4. Model performance comparison of different models (YOLO\_v3 and YOLO\_v5).

Table S2. Comparison of accuracy between YOLO\_v3 and YOLO\_v5 in the prediction of seedling count of maize.

| Parameter | Year | Site        | yolov3   | yolov5   |
|-----------|------|-------------|----------|----------|
| R2        | 2021 | Gongzhuling | 0.9937   | 0.9817   |
|           | 2021 | Zhangye     | 0.9641   | 0.9407   |
|           | 2021 | Zhuozhou    | 0.9984   | 0.9593   |
|           | 2022 | Gongzhuling | 0.8897   | 0.9473   |
|           | 2022 | Zhangye     | 0.9358   | 0.9118   |
|           | 2022 | Zhuozhou    | 0.9753   | 0.9444   |
| Accuracy  | 2021 | Gongzhuling | 92.0004  | 84.2625  |
|           | 2021 | Zhangye     | 83.9272  | 72.9246  |
|           | 2021 | Zhuozhou    | 96.9930  | 77.7648  |
|           | 2022 | Gongzhuling | 77.7558  | 72.3836  |
|           | 2022 | Zhangye     | 43.9647  | 41.0039  |
|           | 2022 | Zhuozhou    | 88.9972  | 82.5250  |
| RMSE      | 2021 | Gongzhuling | 28.8163  | 51.1894  |
|           | 2021 | Zhangye     | 32.5048  | 98.2650  |
|           | 2021 | Zhuozhou    | 11.4990  | 96.4146  |
|           | 2022 | Gongzhuling | 120.1892 | 106.6600 |
|           | 2022 | Zhangye     | 214.0237 | 216.6334 |
|           | 2022 | Zhuozhou    | 68.5236  | 86.1634  |
| ME        | 2021 | Gongzhuling | 1.1391   | 2.0234   |
|           | 2021 | Zhangye     | 1.8767   | 5.6733   |
|           | 2021 | Zhuozhou    | 0.7824   | 6.5602   |
|           | 2022 | Gongzhuling | 3.7707   | 4.0228   |
|           | 2022 | Zhangye     | 12.3567  | 12.9928  |
|           | 2022 | Zhuozhou    | 2.5258   | 4.0174   |
| MAE       | 2021 | Gongzhuling | 1.1453   | 2.1984   |
|           | 2021 | Zhangye     | 3.2033   | 6.0933   |
|           | 2021 | Zhuozhou    | 0.8843   | 6.5694   |
|           | 2022 | Gongzhuling | 3.8140   | 4.0939   |
|           | 2022 | Zhangye     | 12.3567  | 12.9928  |
|           | 2022 | Zhuozhou    | 2.5747   | 4.0261   |
